# Supplementary material for: Prevalence, Reasons, and Factors Associated with Loss to Follow-Up in Newly Diagnosed Glaucoma Suspect and Glaucoma Patients in Thailand
Source: Research Square preprint supplement (doi:10.21203/rs.3.rs-5945160/v1), 2025-05-06
Supplement: Supplementary file 1 [file 0682c010d6bd76f80d1d3813.docx]

**Prevalence, Reasons, and Factors Associated with Loss to Follow-Up in Newly Diagnosed Glaucoma Suspects and Glaucoma Patients in Thailand**

Thanitta Kittisupkajorn1, Isaraporn Treesit1, Panhathai Yaisiri1, Panrapee Funarunart1

1Phramongkutklao Hospital, Department of Ophthalmology, Bangkok, 10400, Thailand

**Section 1: Personal Information and Glaucoma Treatment Follow-Up**

- **Reasons for missed follow-up appointments at the ophthalmology department** (Select all that apply):

☐ Forgot the appointment date

☐ Miscommunication regarding the appointment

☐ Concern about contracting COVID-19

☐ Lack of understanding about glaucoma

☐ Financial issues related to treatment

☐ Financial issues related to transportation

☐ Difficulty traveling to the hospital

☐ Work obligations preventing follow-up

☐ Other chronic diseases preventing follow-up

☐ Lack of a caregiver to assist with transportation

☐ Side effects from glaucoma medication

☐ Dissatisfaction with the treatment or services provided by doctors, nurses, or staff

☐ Other (Please specify: __________)

- **After missing a follow-up appointment, have you continued using anti-glaucoma eye drops?**

☐ Yes (Proceed to question 1)

☐ No (Proceed to question 2)

1. **Source of the medication**:

☐ Purchased by yourself

☐ Hospital under healthcare benefits

☐ Other (Please specify: __________)

1. **Reasons for discontinuing eye drops after missing follow-up** (Select all that apply):

☐ Lack of awareness about disease progression or severity

☐ Unaware that continuous use of eye drops is necessary

☐ Experienced undesirable side effects from the medication

☐ Financial issues

☐ Inability to follow the prescribed medication schedule (e.g., lack of time)

☐ Other (Please specify: __________)

**Section 2: Assessment of Knowledge and Understanding of Glaucoma**

- **Agree**: You strongly agree with the statement.
- **Unsure**: You are uncertain about the statement.
- **Disagree**: You do not agree with the statement.

| **Statements** | **Agree** | **Unsure** | **Disagree** |
| --- | --- | --- | --- |
| 1. Chronic glaucoma is curable. | ☐ | ☐ | ☐ |
| 2. The primary danger of glaucoma is vision loss. | ☐ | ☐ | ☐ |
| 3. Uncontrolled intraocular pressure can lead to blindness. | ☐ | ☐ | ☐ |
| 4. Untreated chronic glaucoma increases the financial burden of treatment. | ☐ | ☐ | ☐ |
| 5. Treated chronic glaucoma patients can regain normal vision. | ☐ | ☐ | ☐ |
| 6. If intraocular pressure is reduced to normal, further doctor visits are unnecessary. | ☐ | ☐ | ☐ |
| 7. Regular medication helps control intraocular pressure and prevent vision loss. | ☐ | ☐ | ☐ |
| 8. Asymptomatic glaucoma patients may still experience vision loss. | ☐ | ☐ | ☐ |
| 9. If you experience side effects from glaucoma medication, you should stop using it and consult a doctor immediately. | ☐ | ☐ | ☐ |
| 10. Missing appointments can lead to uncontrolled intraocular pressure and a higher risk of vision loss. | ☐ | ☐ | ☐ |
